# Supplementary material for: Broad-Spectrum Antimicrobial ZnMintPc Encapsulated in Magnetic-Nanocomposites with Graphene Oxide/MWCNTs Based on Bimodal Action of Photodynamic and Photothermal Effects
Source: MDPI journal article supplement (doi:10.3390/pharmaceutics14040705), 2022-03-26
Supplement: s1 [file s1]

Supplementary Material

# Broad-Spectrum Antimicrobial ZnMintPc Encapsulated in Magnetic-Nanocomposites with Graphene Oxide/MWCNTs Based on Bimodal Action of Photodynamic and Photothermal Effects

Coralía Fabiola Cuadrado, Antonio Díaz-Barrios, Kleber Orlando Campaña, Eric Cardona Romani, Francisco Quiroz, Stefania Nardecchia, Alexis Debut, Karla Vizuete, Dario Niebieskikwiat, Camilo Ernesto Ávila, Mateo Alejandro Salazar, Cristina Garzón-Romero, Ailín Blasco-Zúñiga, Miryan Rosita Rivera and María Paulina Romero

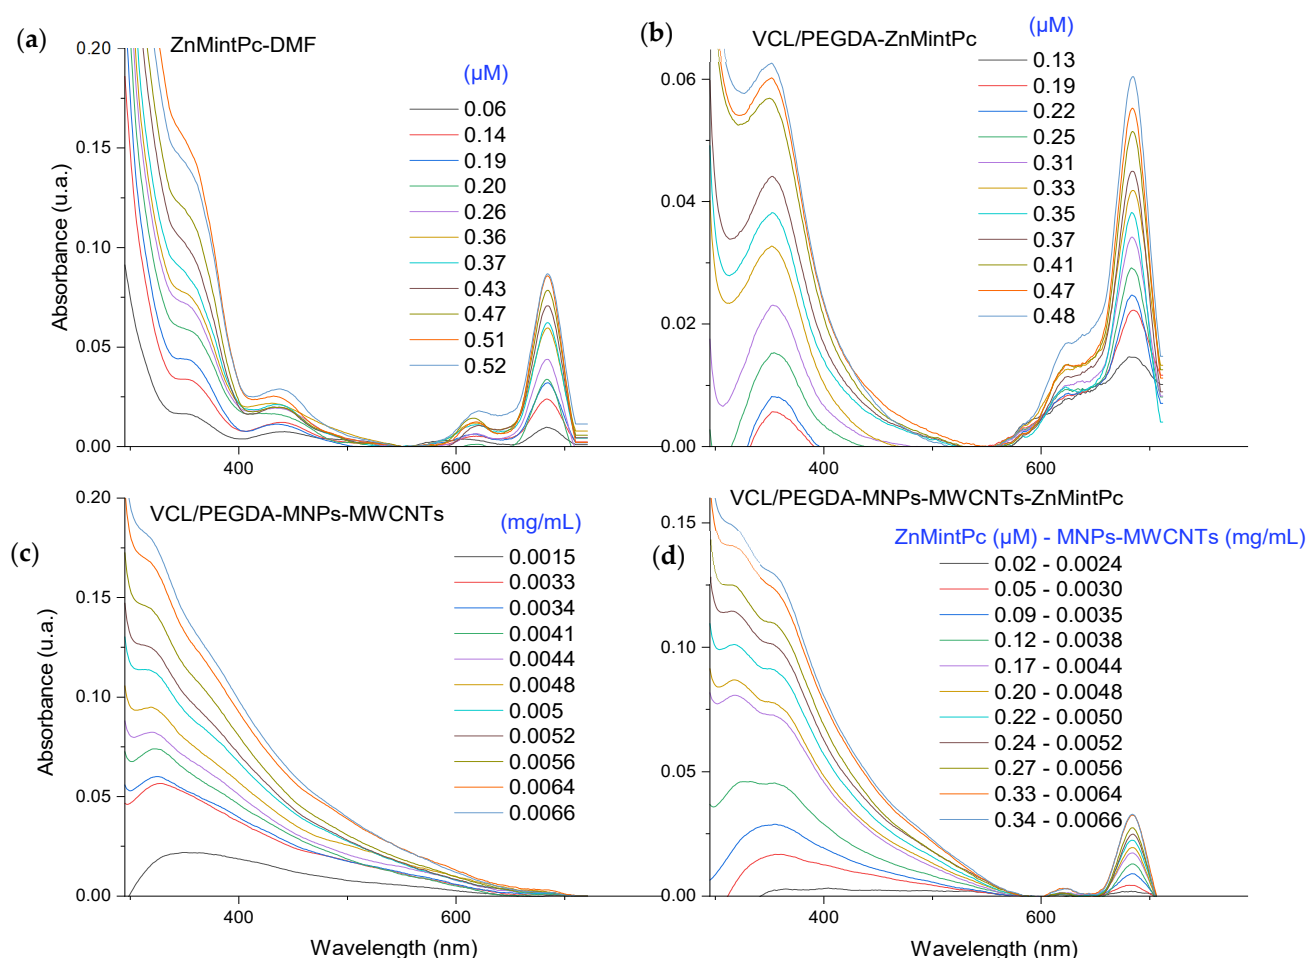

**Figure S1.** Optical properties: (a) UV-VIS spectra of DMF(3mL) with different concentrations of ZnMintPc, (b) UV-VIS spectra of VCL/PEGDA(3mL) with different concentrations of ZnMintPc, (c). UV-VIS spectra of VCL/PEGDA (3mL) with MNPs-MWCNTs at different concentrations. (d). VCL/PEGDA with MNPs-MWCNTs and ZnMintPc at different concentrations.

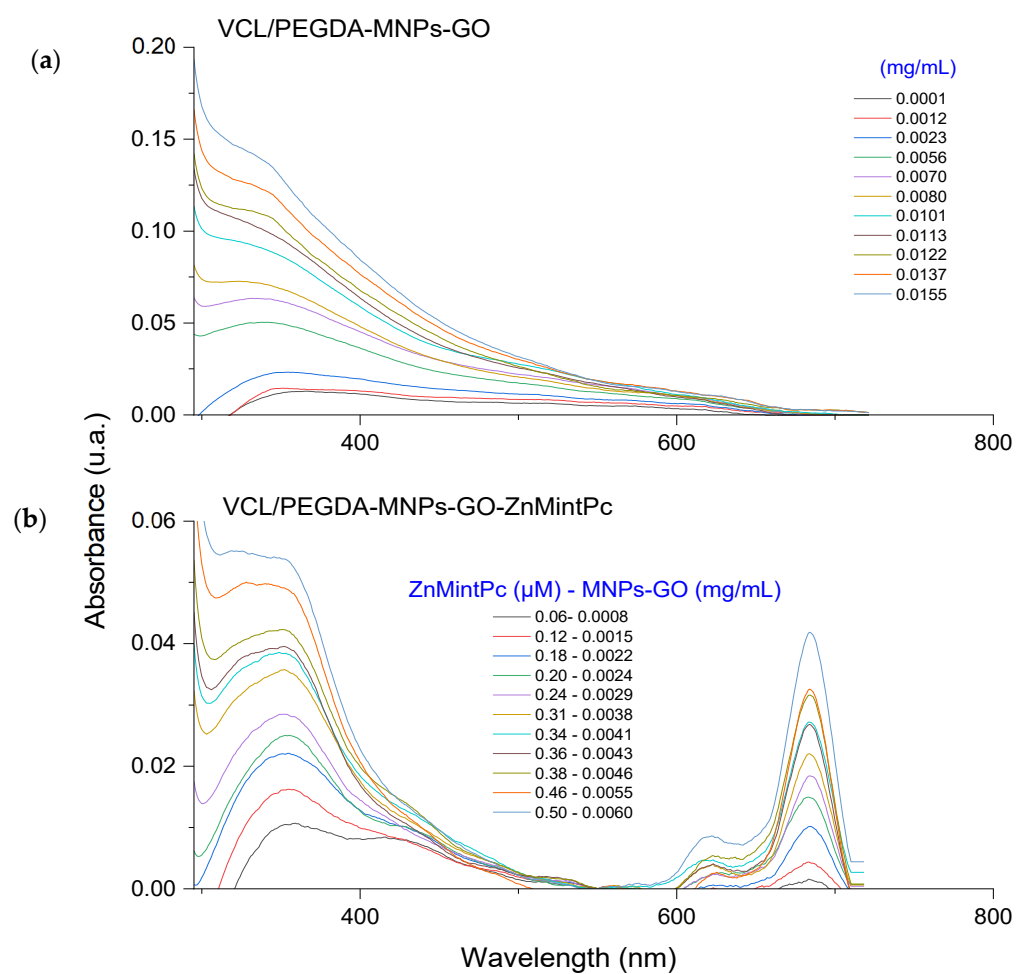

**Figure S2.** Optical properties of Magnetic Nanocomposites: **(a)** UV-VIS spectra of VCL/PEGDA (3mL) with different concentrations of MNPs-GO, **(b)** UV-VIS spectra of VCL/PEGDA (3mL) with MNPs-GO-ZnMintPc at different concentrations.

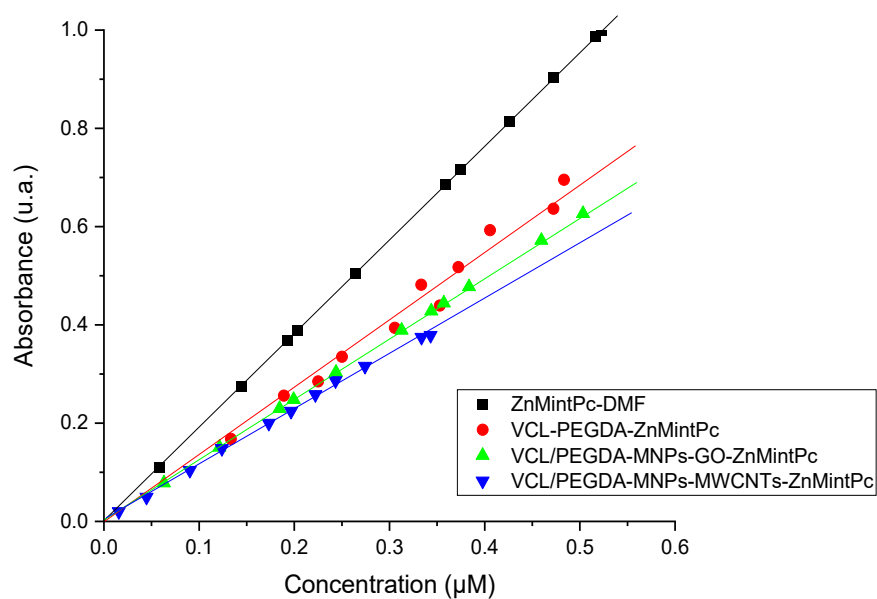

(a)

|                                       | Absorbance |
|---------------------------------------|------------|
| <u>ZnMintPc-DMF</u>                   | 100%       |
| <u>VCL/PEGDA-ZnMintPc</u>             | 71.47%     |
| <u>VCL/PEGDA-MNPs-GO-ZnMintPc</u>     | 64.46%     |
| <u>VCL/PEGDA-MNPs-MWCNTs-ZnMintPc</u> | 61.73%     |

(b)

**Figure S3.** (a) Composites calibration curve of ZnMintPc (0.52  $\mu\text{M}$ ) from: PS in DMF, VCL/PEGDA, VCL/PEGDA-MNPs-GO and VCL/PEGDA-MNPs-MWCNTs; (b) Absorbance of ZnMintPc-DMF and nanocomposites.

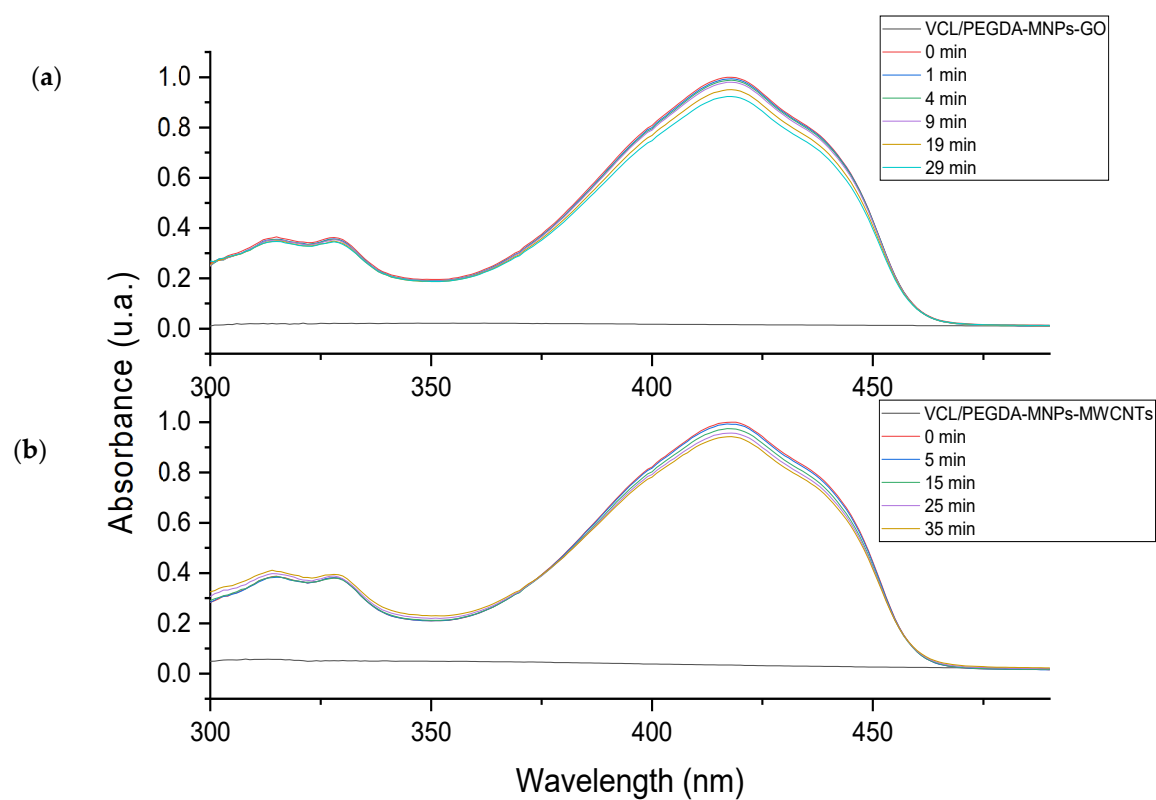

**Figure S4.** Photodynamic Analyses of: (a) UV-VIS spectra of VCL/PEGDA-MNPs-GO and (b) UV-VIS spectra of VCL/PEGDA-MNPs-MWCNTs.

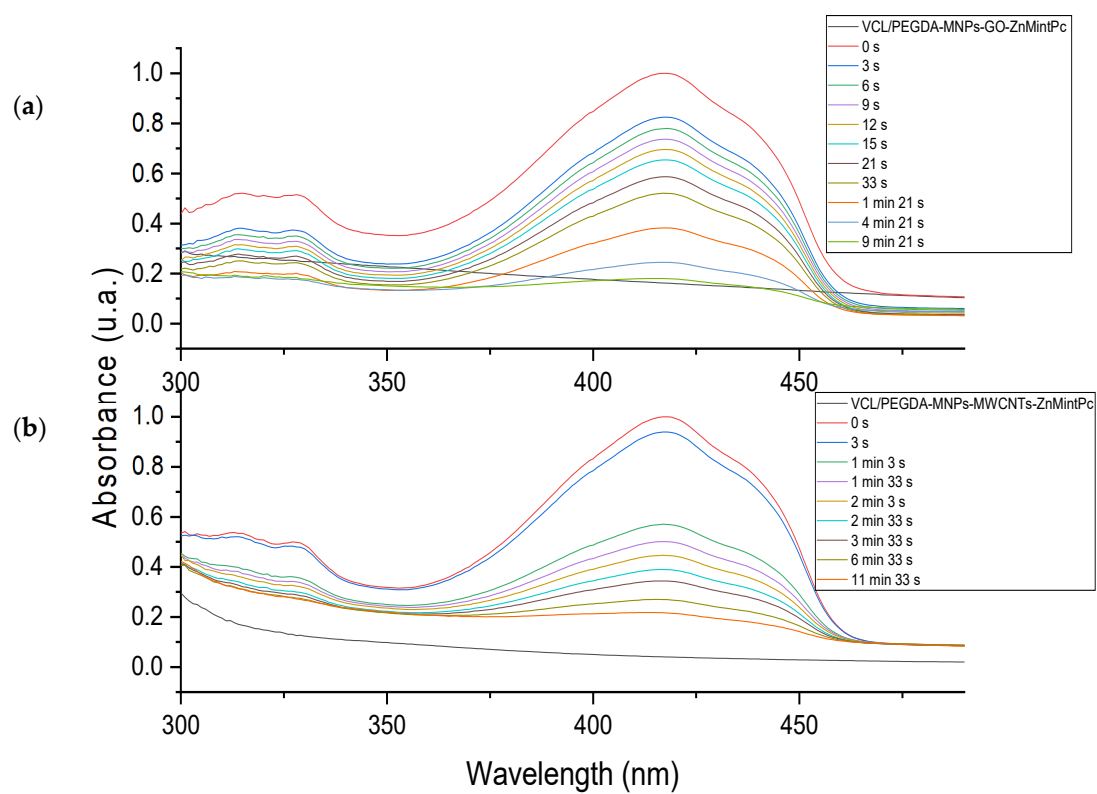

**Figure S5.** Photodynamic Analyses of: (a) UV-VIS spectra of VCL/PEGDA-MNPs-GO-ZnMintPc and (b) UV-VIS spectra of VCL/PEGDA-MNPs-MWCNTs-ZnMintPc.

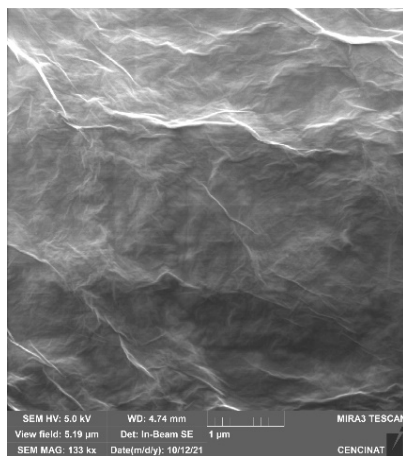

(a)

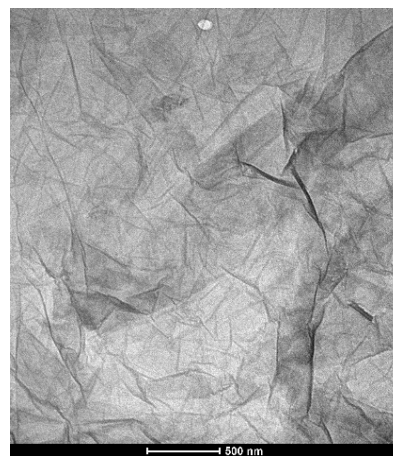

(b)

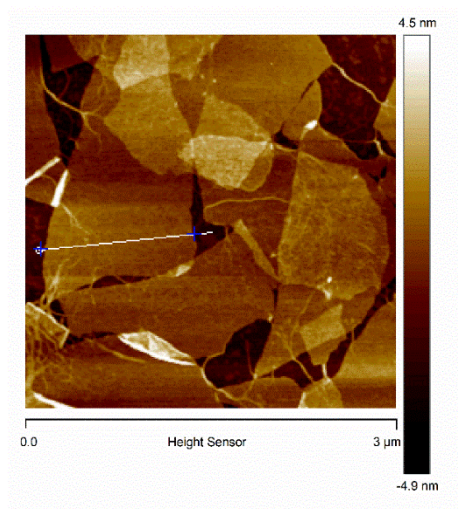

(c)

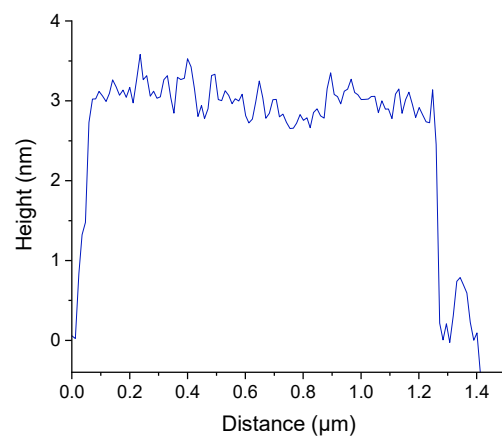

(d)

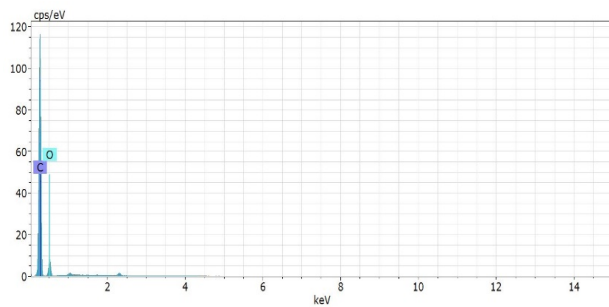

(e)

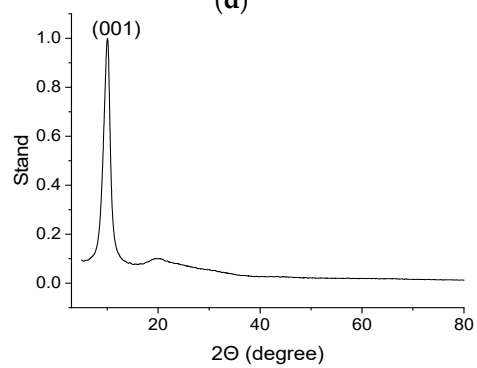

(f)

**Figure S6.** (a) SEM analysis, (b) TEM analysis, (c) Atomic force microscopy (AFM) image (d) Height profile along the line of the panel from GO (e) EDS analysis and (f) XRD of GO.

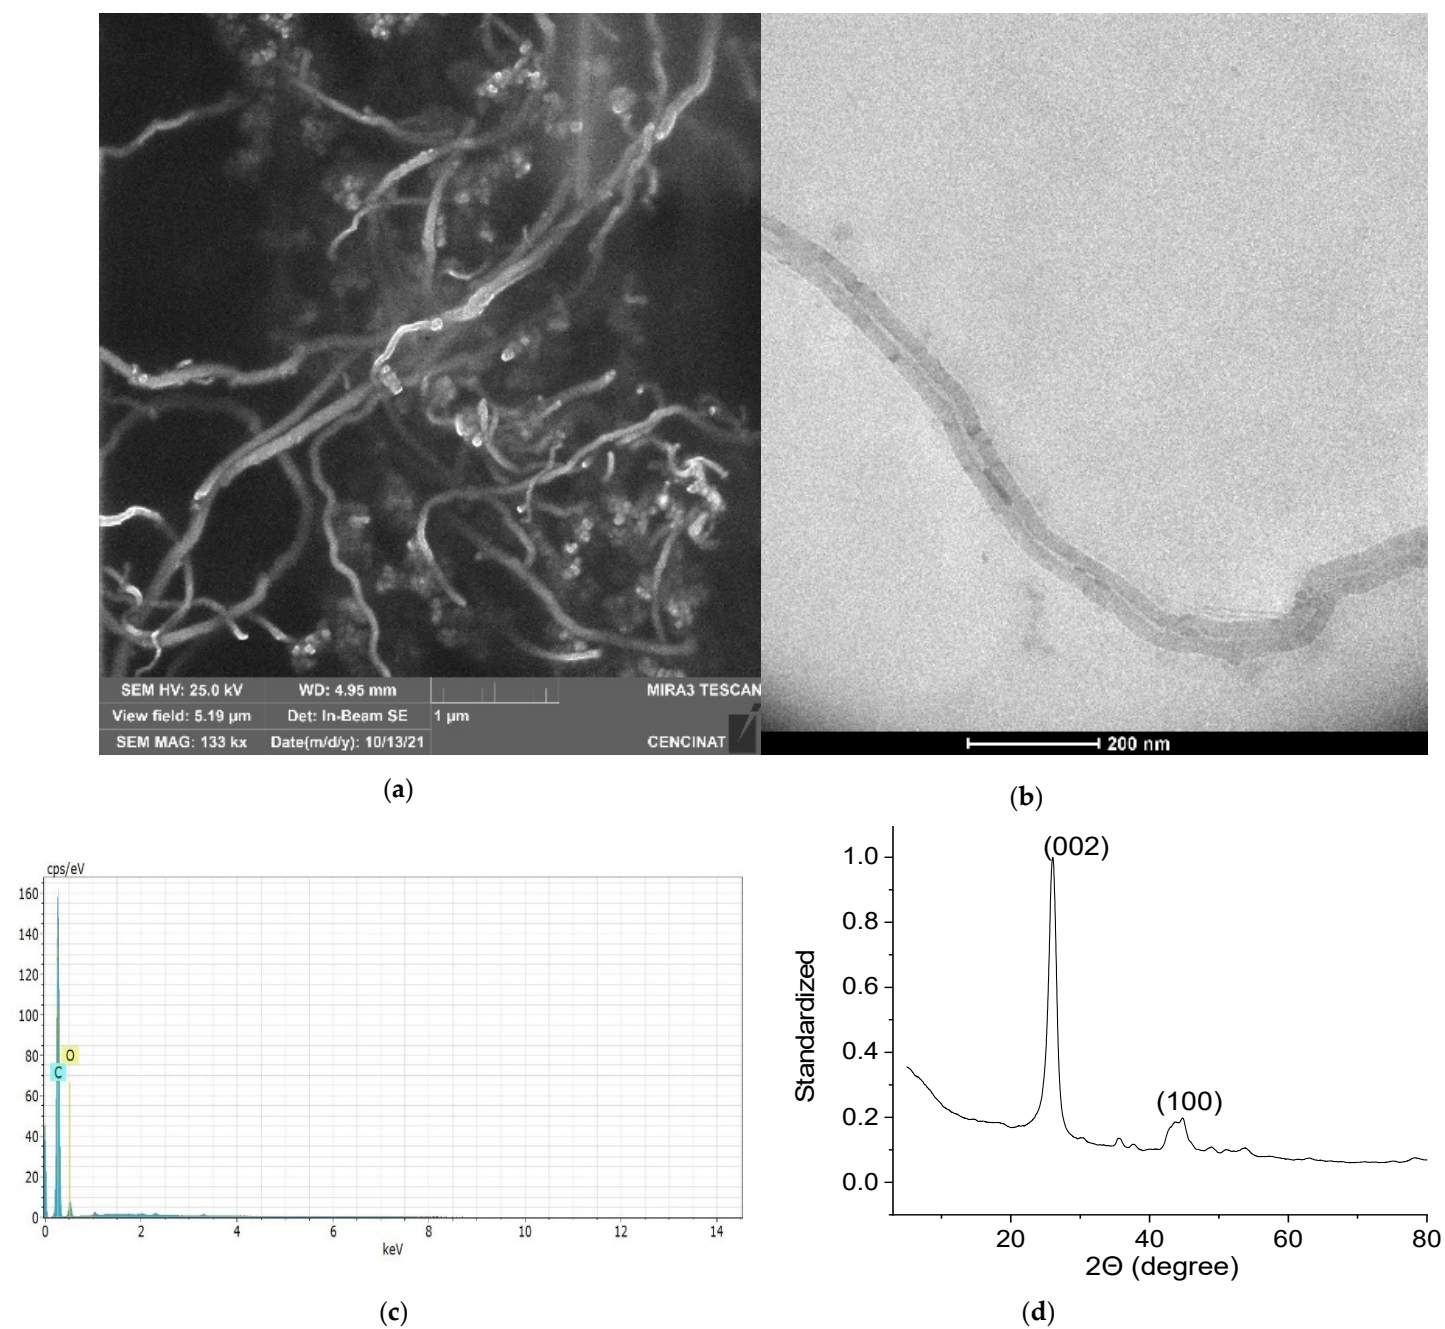

**Figure S7.** (a) SEM, (b) TEM, (c) EDS and (d) XRD analysis of MWCNTs.



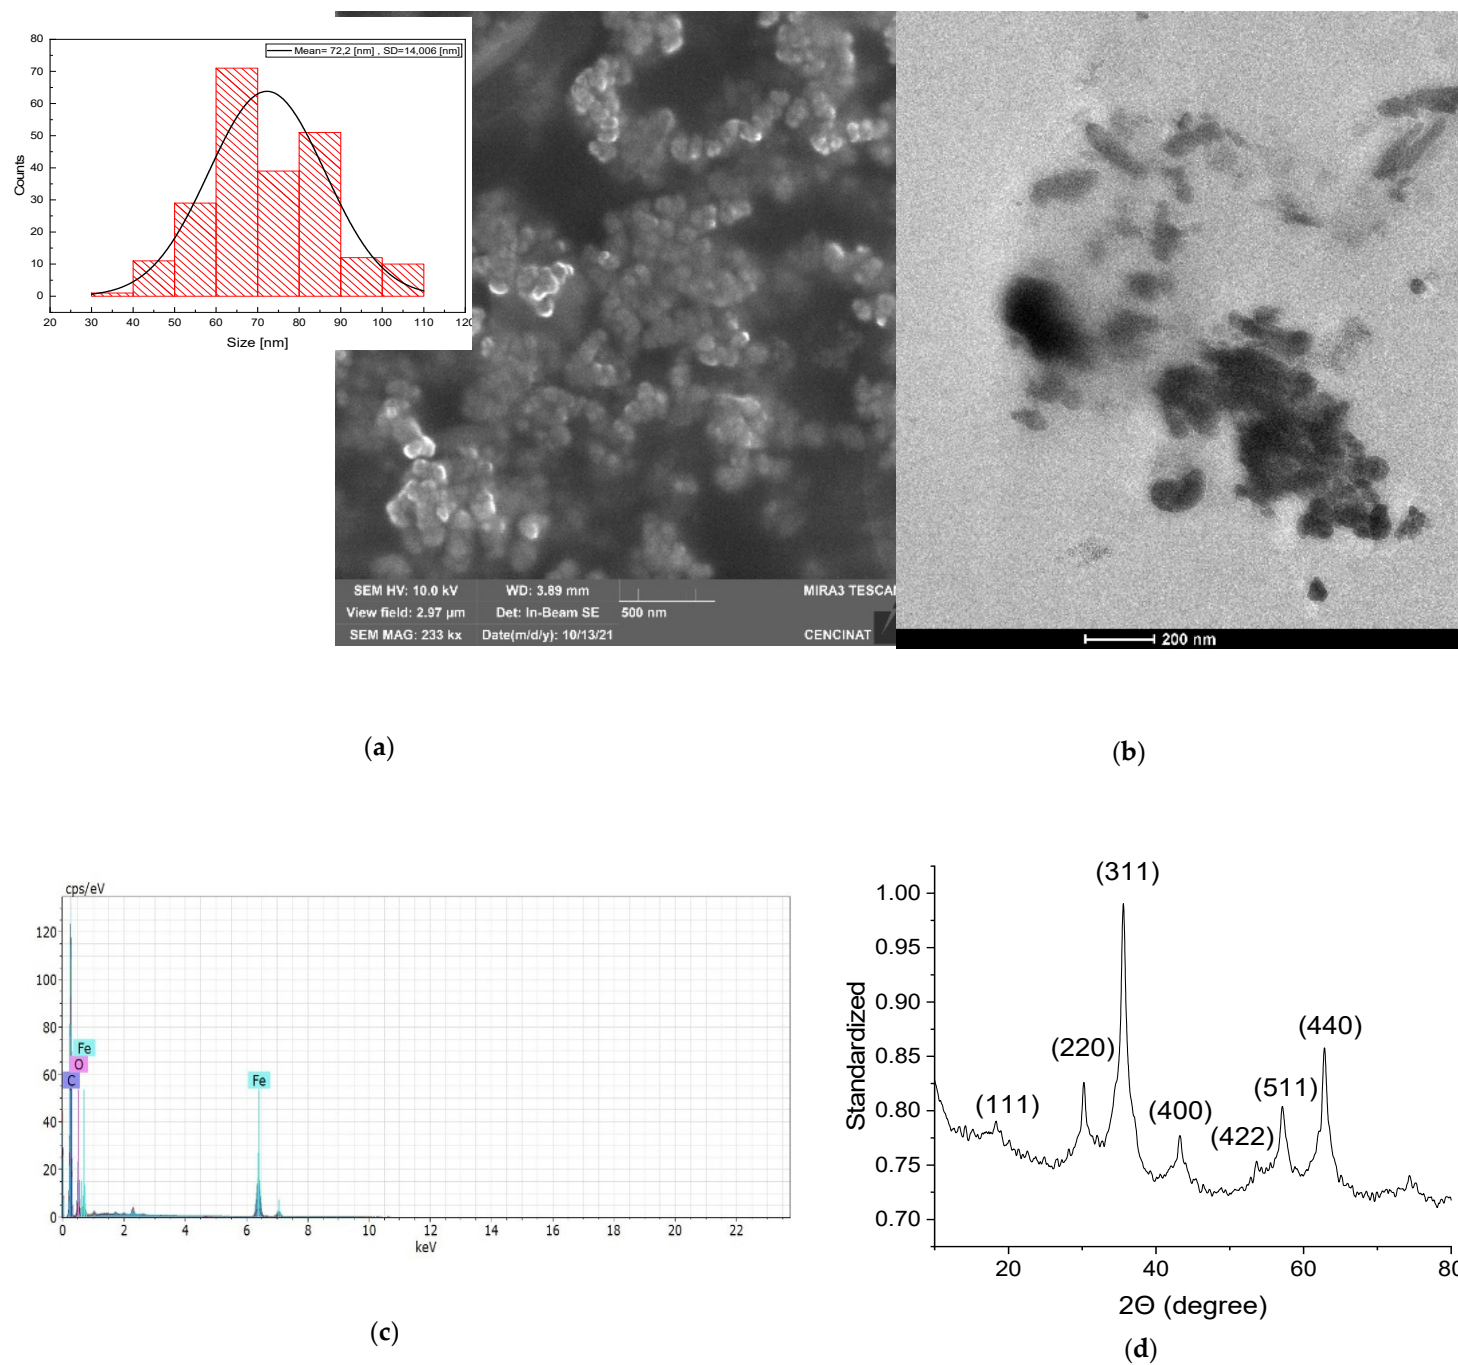

**Figure S8.** (a) SEM, (b) TEM, (c) EDS and (d) XRD analysis of MNPs.



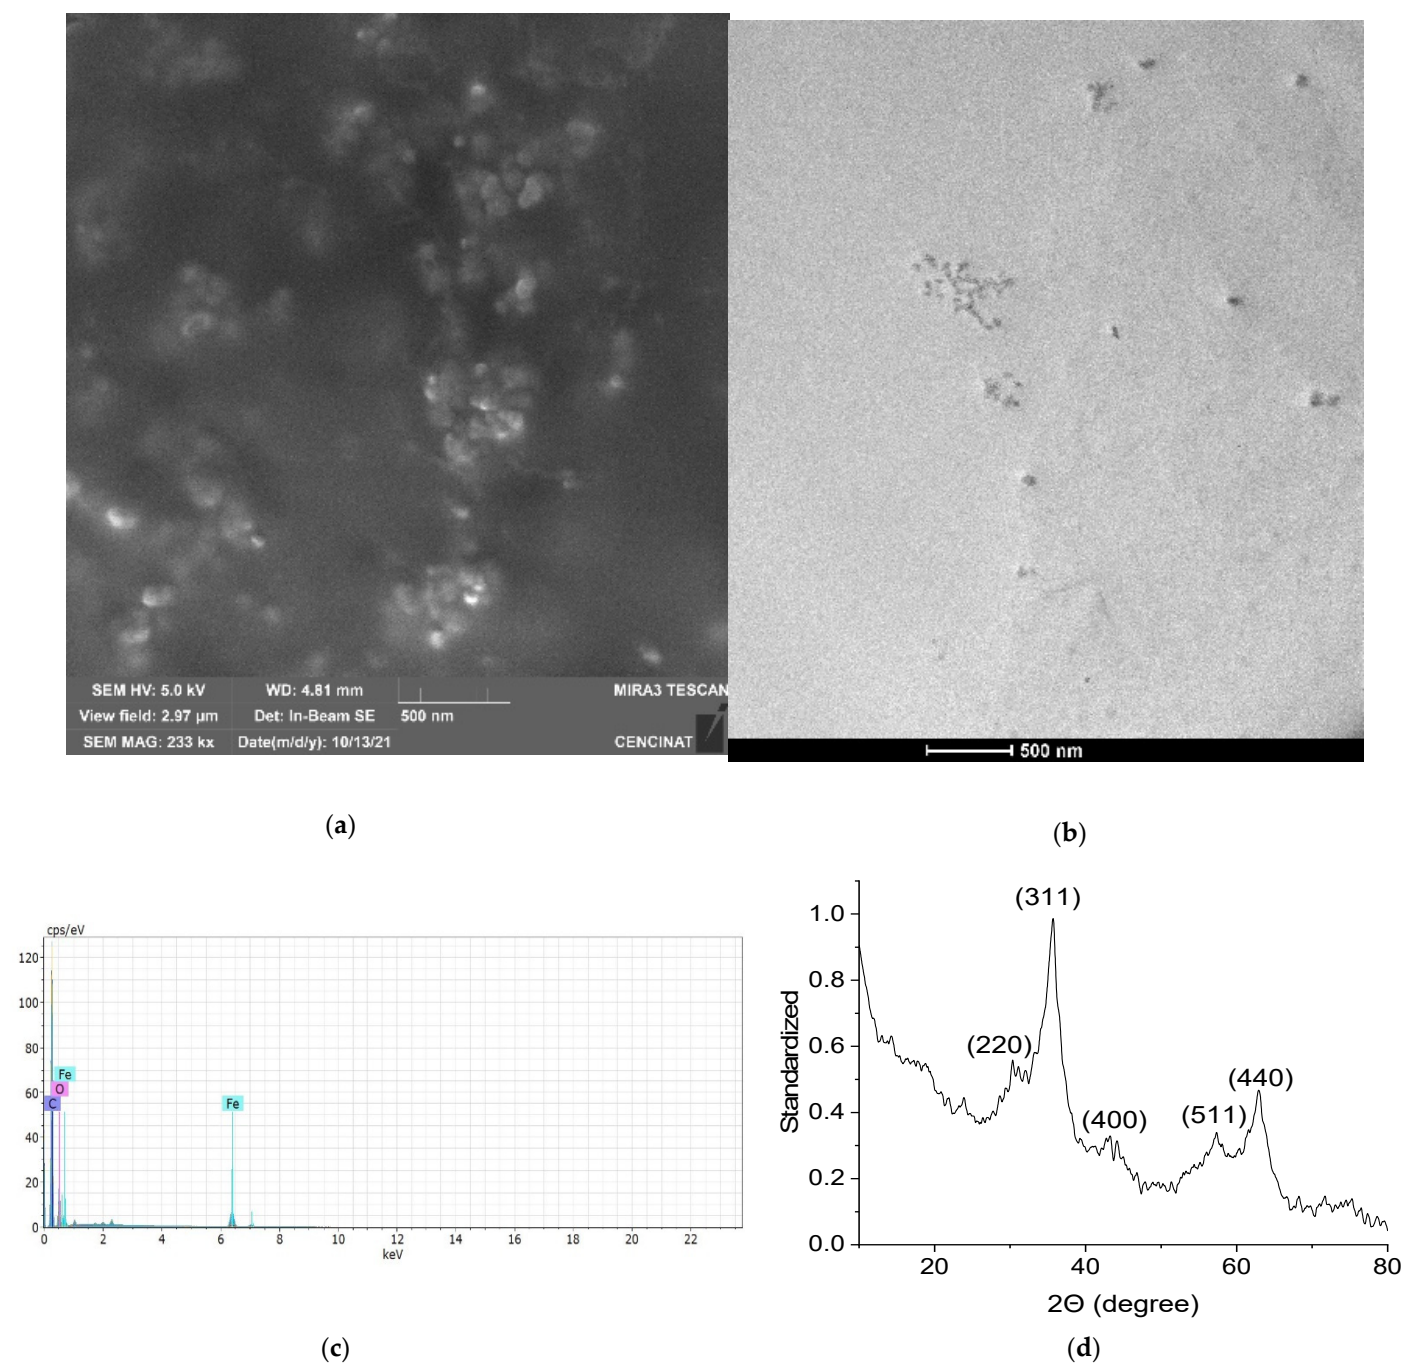

Figure S9. (a) SEM, (b) TEM, (c) EDS and (d) XRD analysis of MNPs-GO.

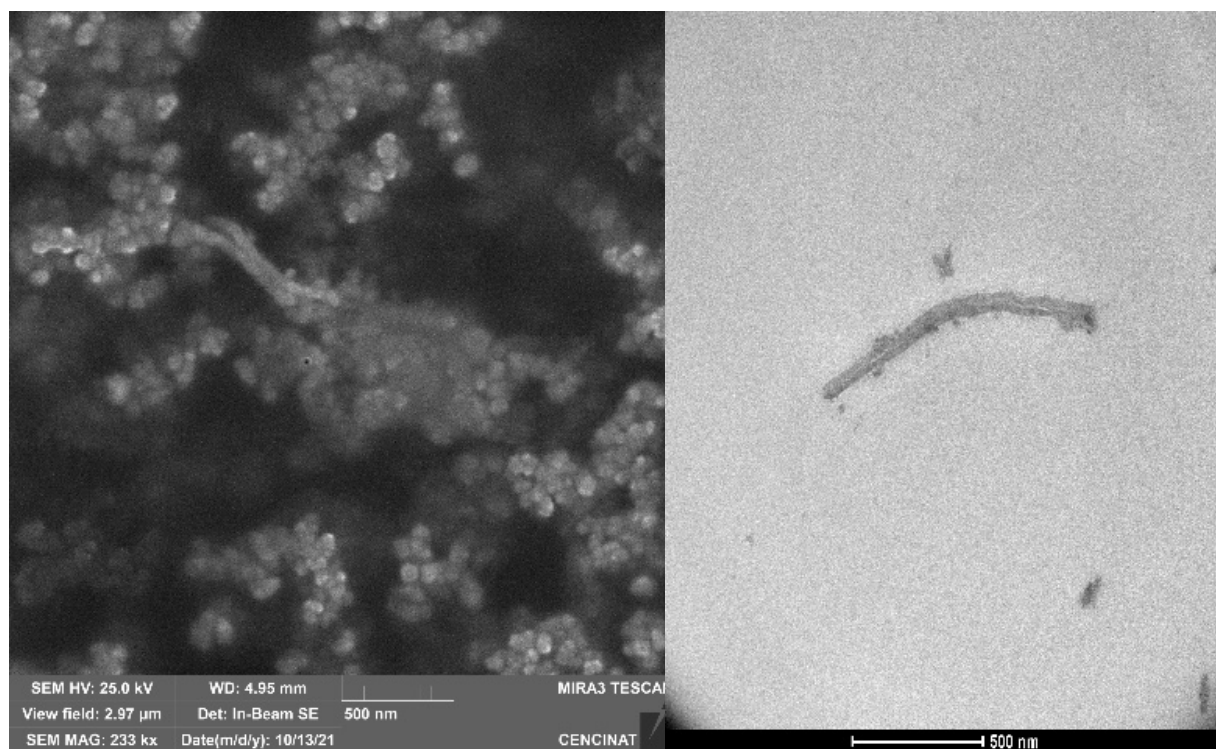

(a)

(b)

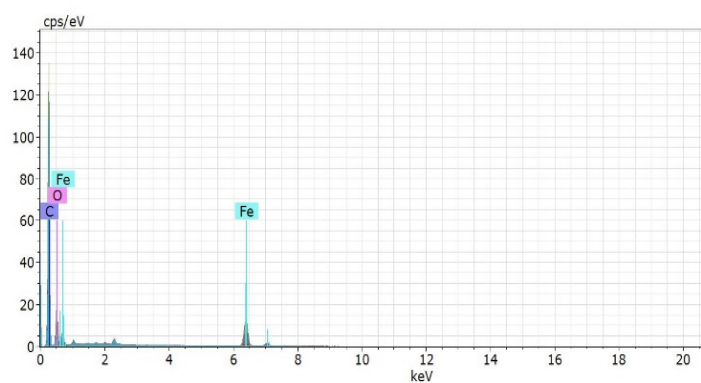

(c)

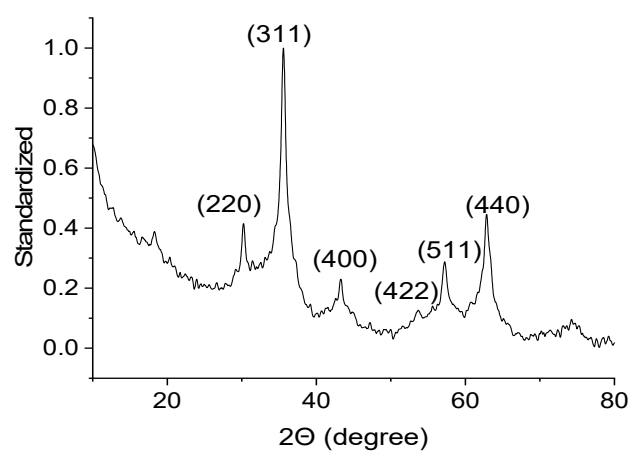

(d)

**Figure S10.** (a) SEM, (b) TEM, (c) EDS and (d) XRD analysis of MNPs-MWCNTs.

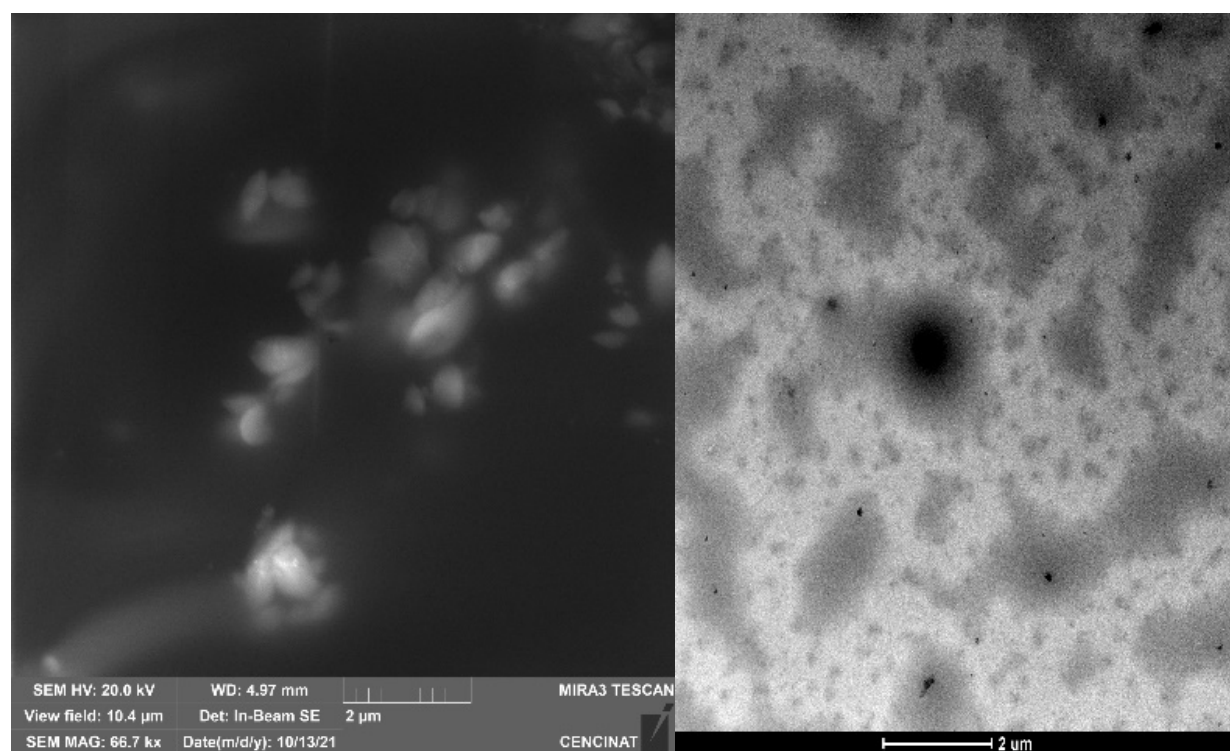

(a)

(b)

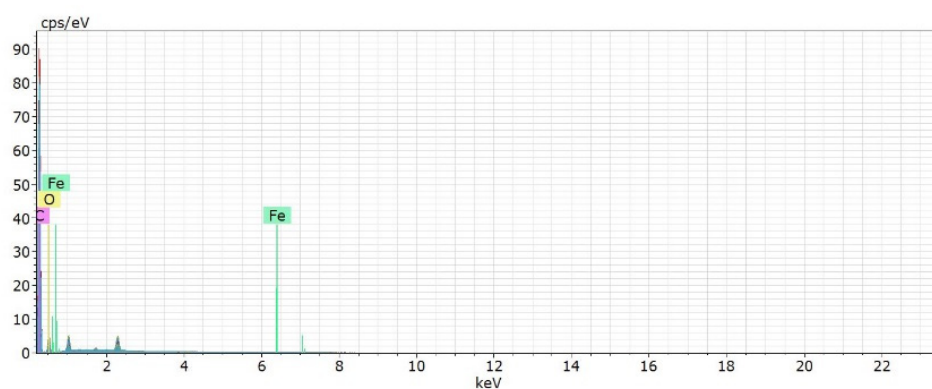

(c)

**Figure S11.** (a) SEM, (b) TEM, (c) EDS analysis of VCL/PEGDA-MNPs-GO.



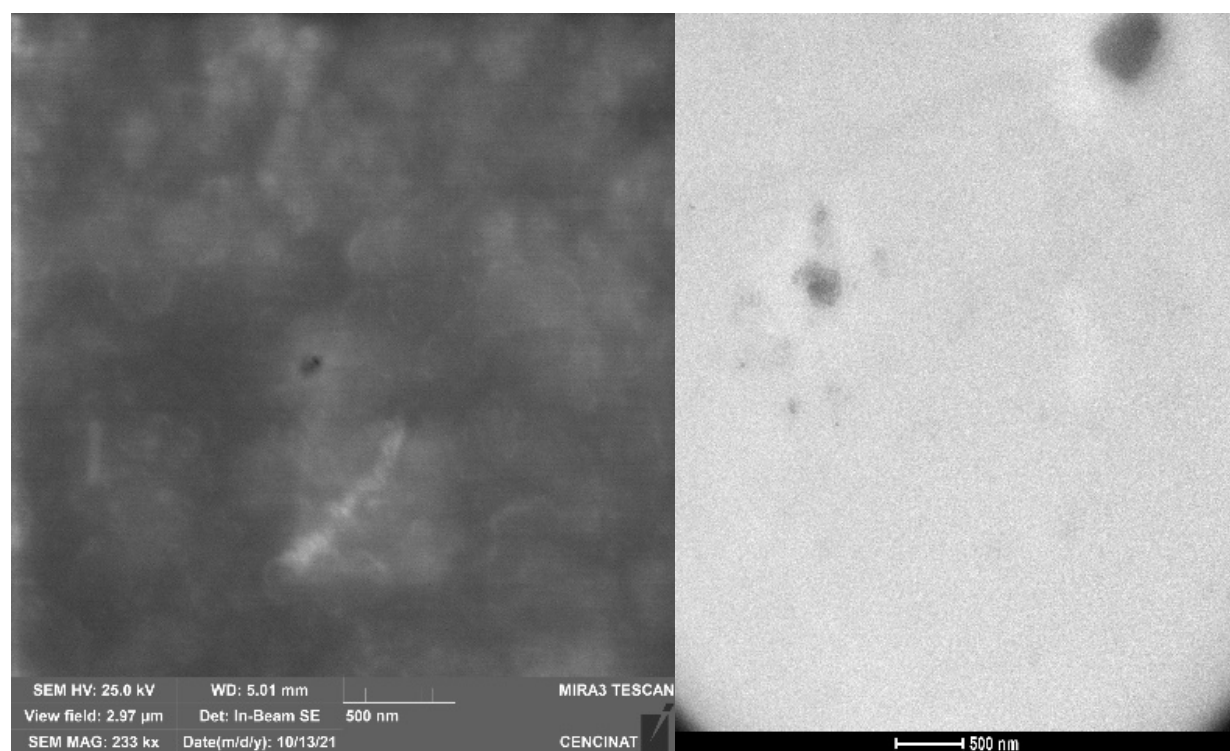

(a)

(b)

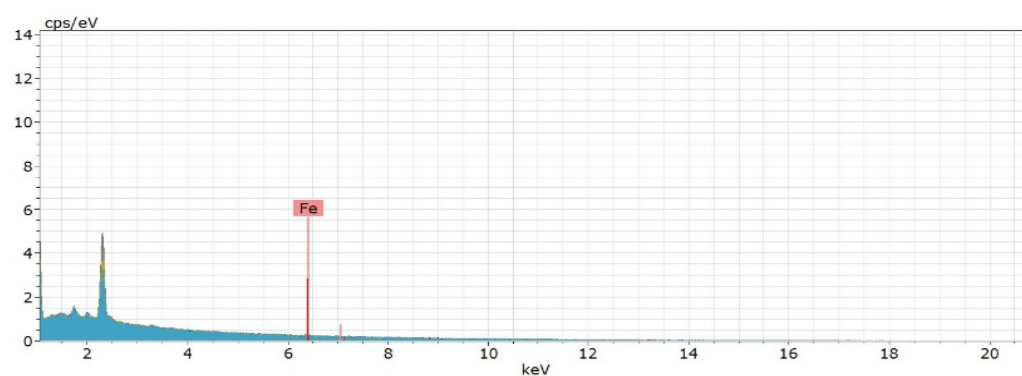

(c)

**Figure S12.** (a) SEM, (b) TEM, (c) EDS analysis of VCL/PEGDA-MNPs-MWCNTs.

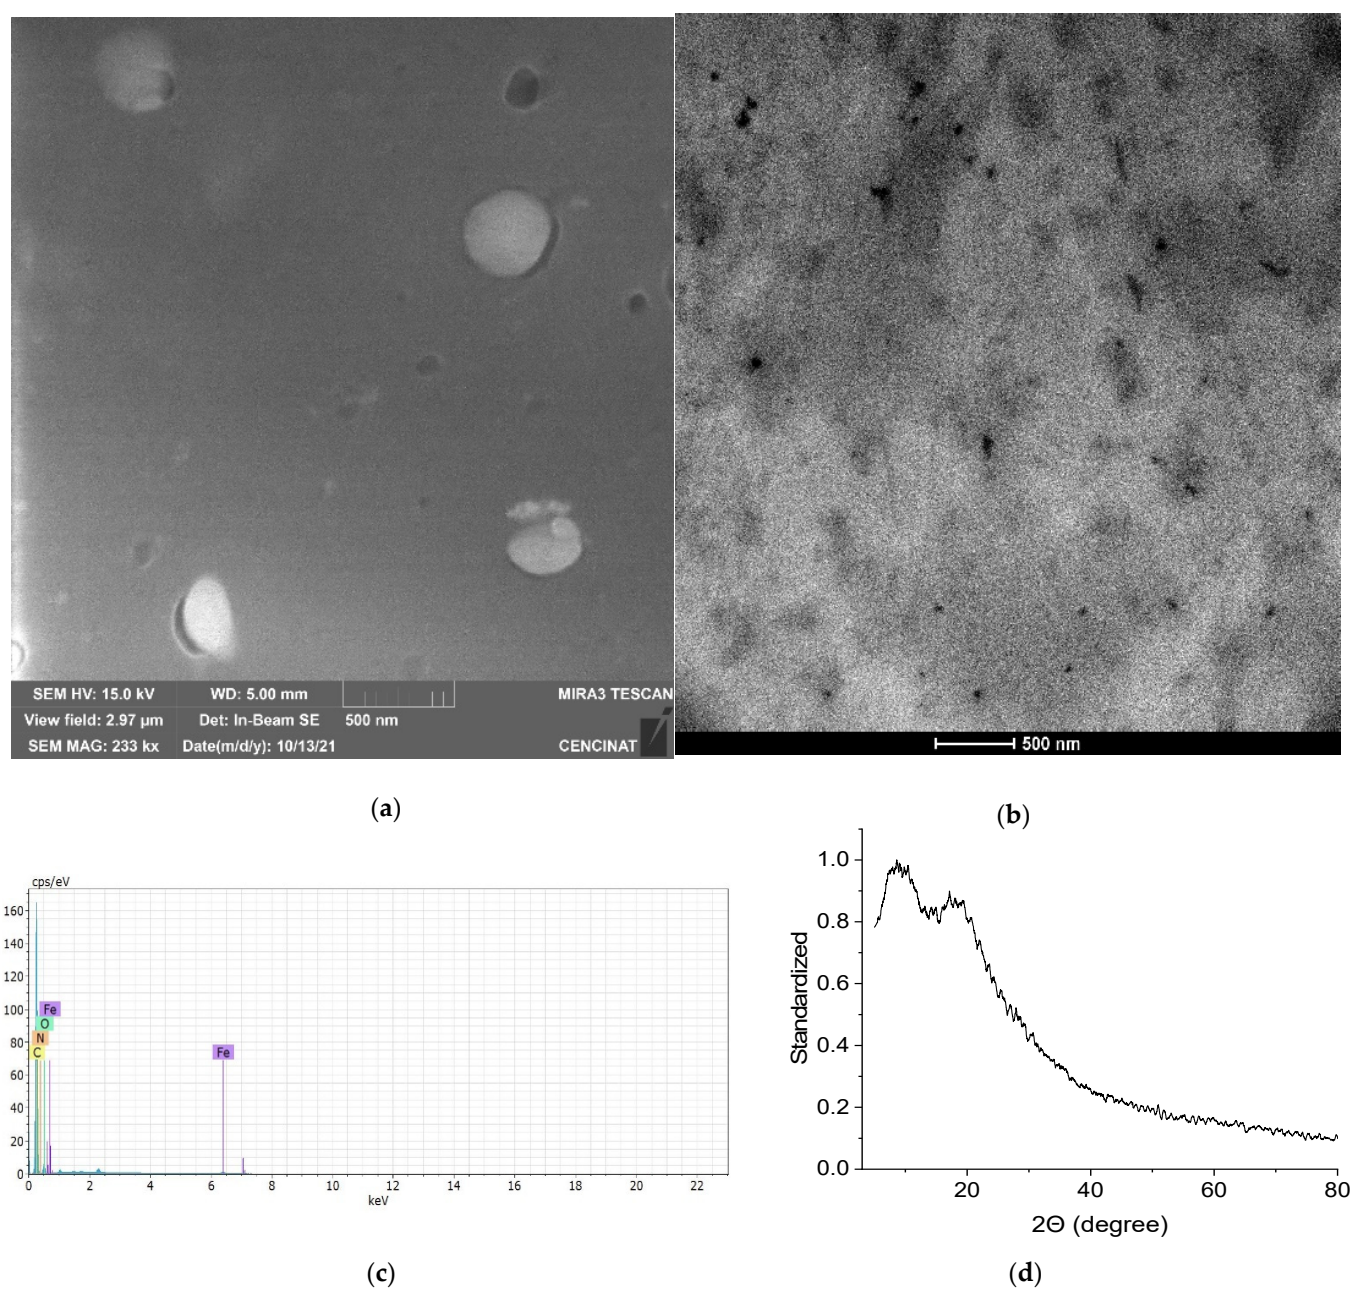

**Figure S13.** (a) SEM, (b) TEM, (c) EDS and (d) XRD analysis of VCL/PEGDA-MNPs-GO-ZnMintPc.

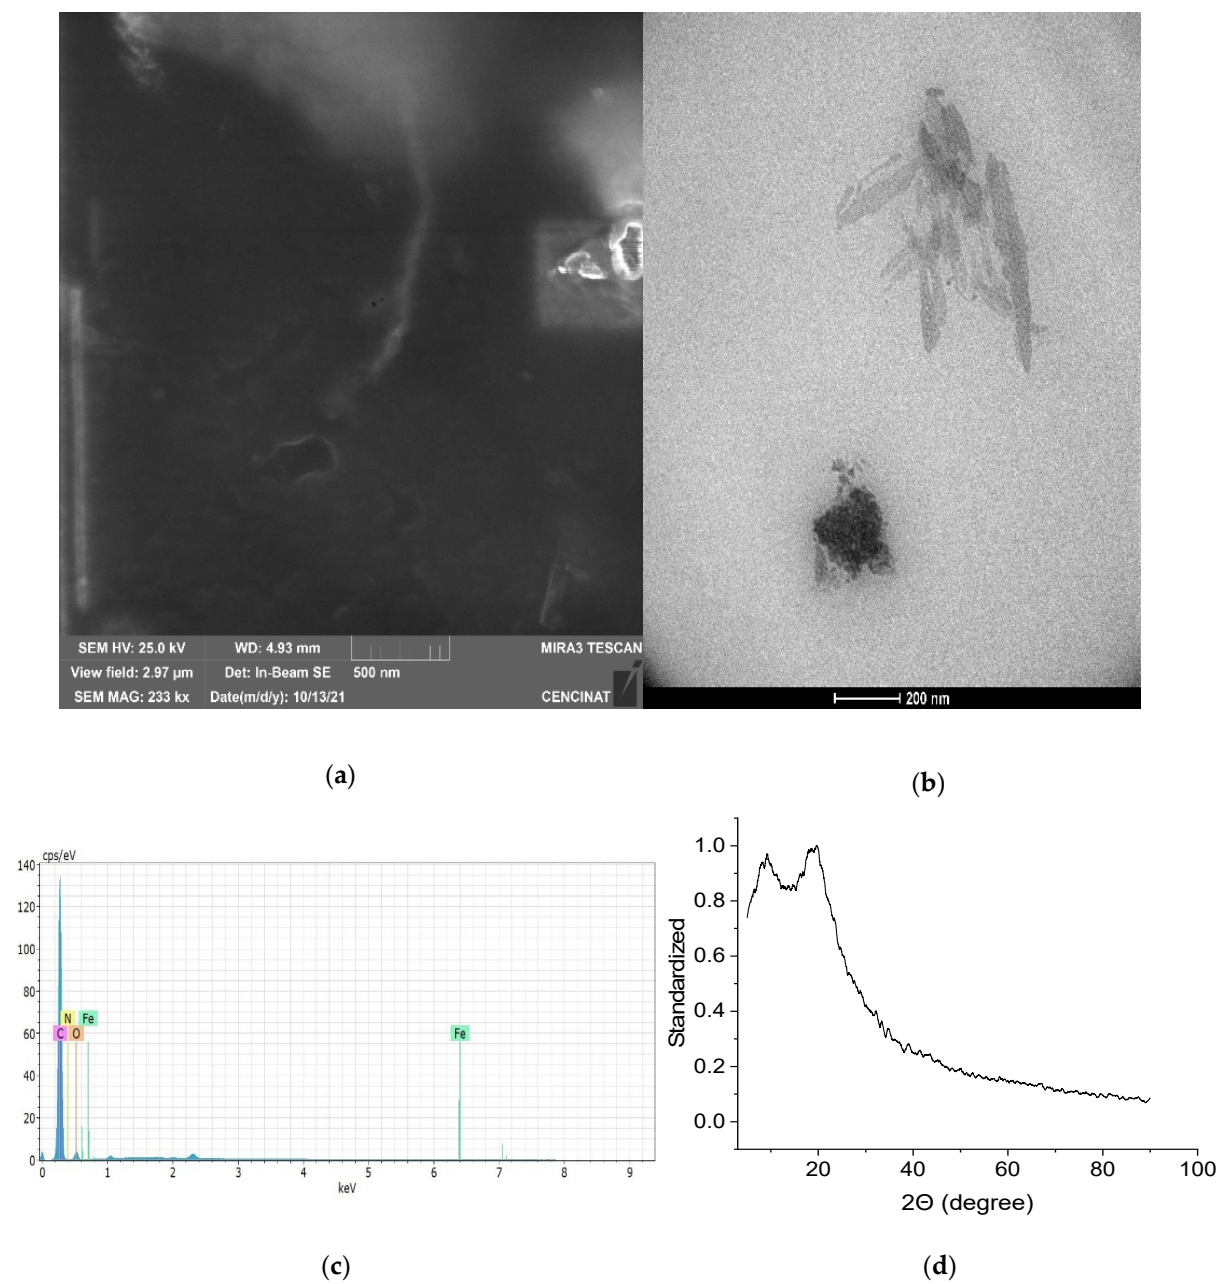

**Figure S14.** (a) SEM, (b) TEM, (c) EDS and (d) XRD analysis of VCL/PEGDA-MNPs-MWCNTs-ZnMintPc.
